# Supplementary material for: Tailored Supramolecular Cage for Efficient Bio-Labeling
Source: MDPI journal article supplement (doi:10.3390/ijms24032147), 2023-01-21
Supplement: s1 [file s1]

## Supporting Information

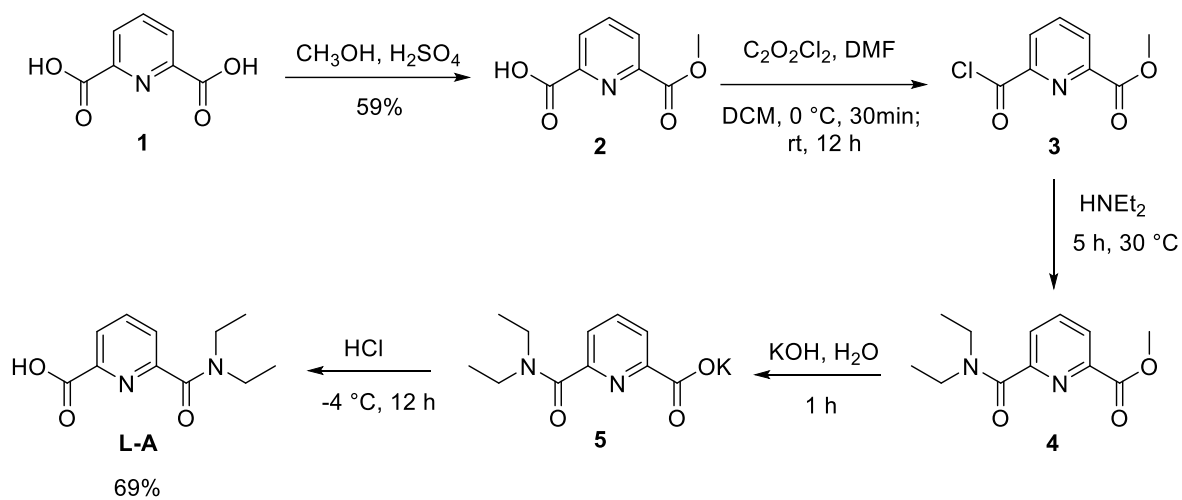

**Figure S1.** Synthesis of L-A.

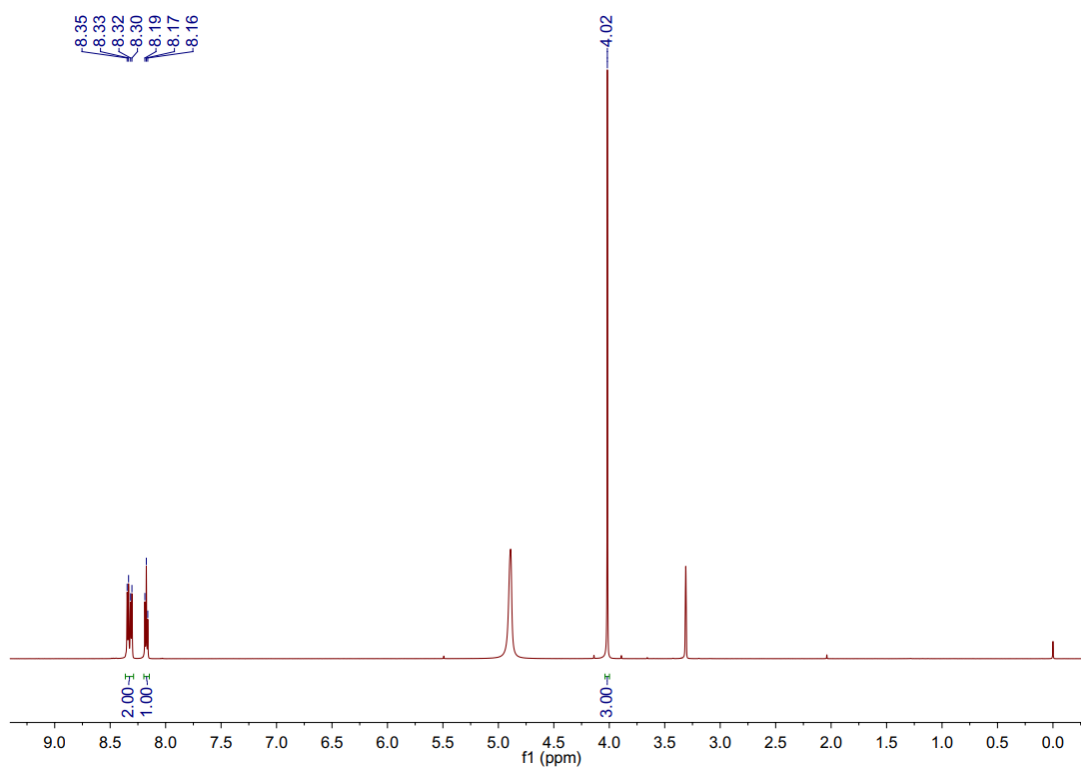

**Figure S2.** <sup>1</sup>H NMR (600 MHz, 298 K, CD<sub>3</sub>OD) spectrum of **2**.

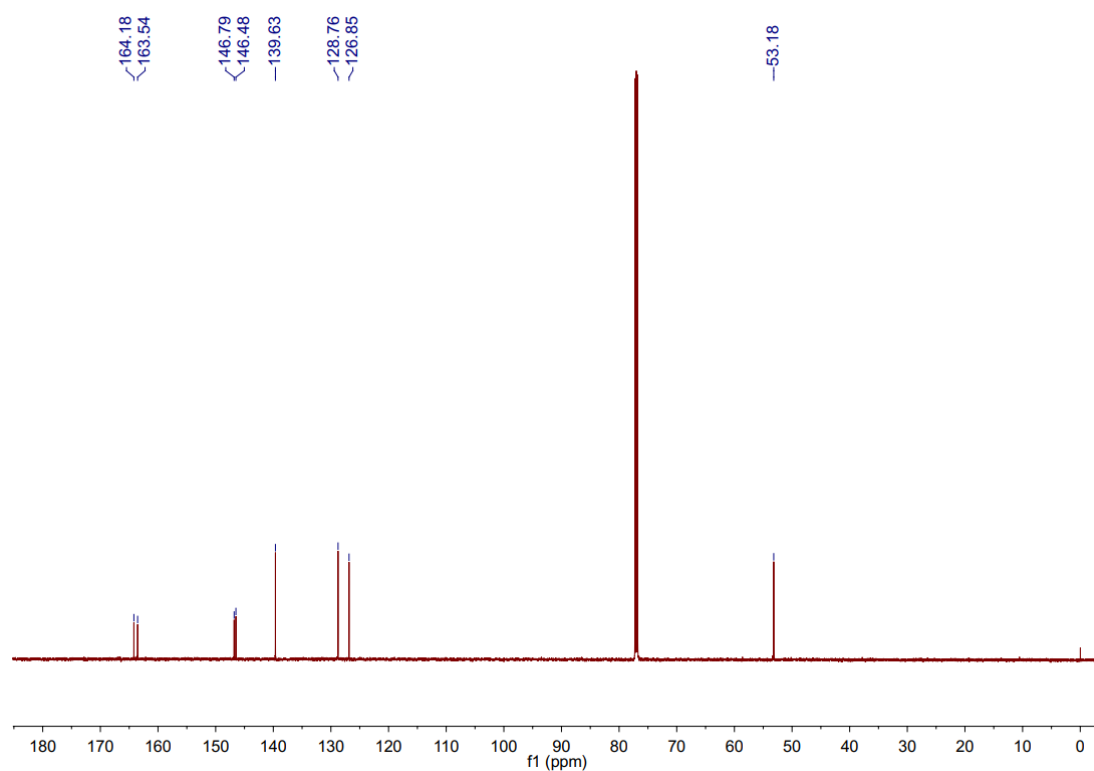

**Figure S3.** <sup>13</sup>C NMR (151 MHz, 298 K, CD<sub>3</sub>OD) spectrum of **2**.

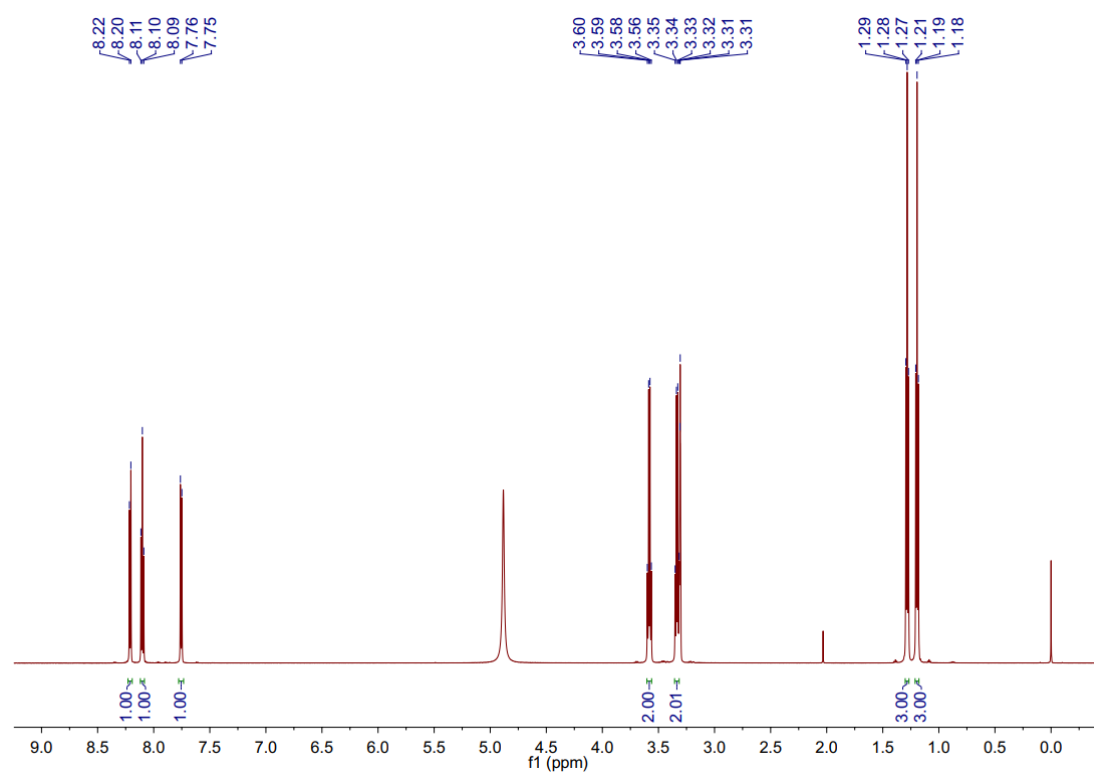

**Figure S4.** <sup>1</sup>H NMR (600 MHz, 298 K, CD<sub>3</sub>OD) spectrum of **L-A**.

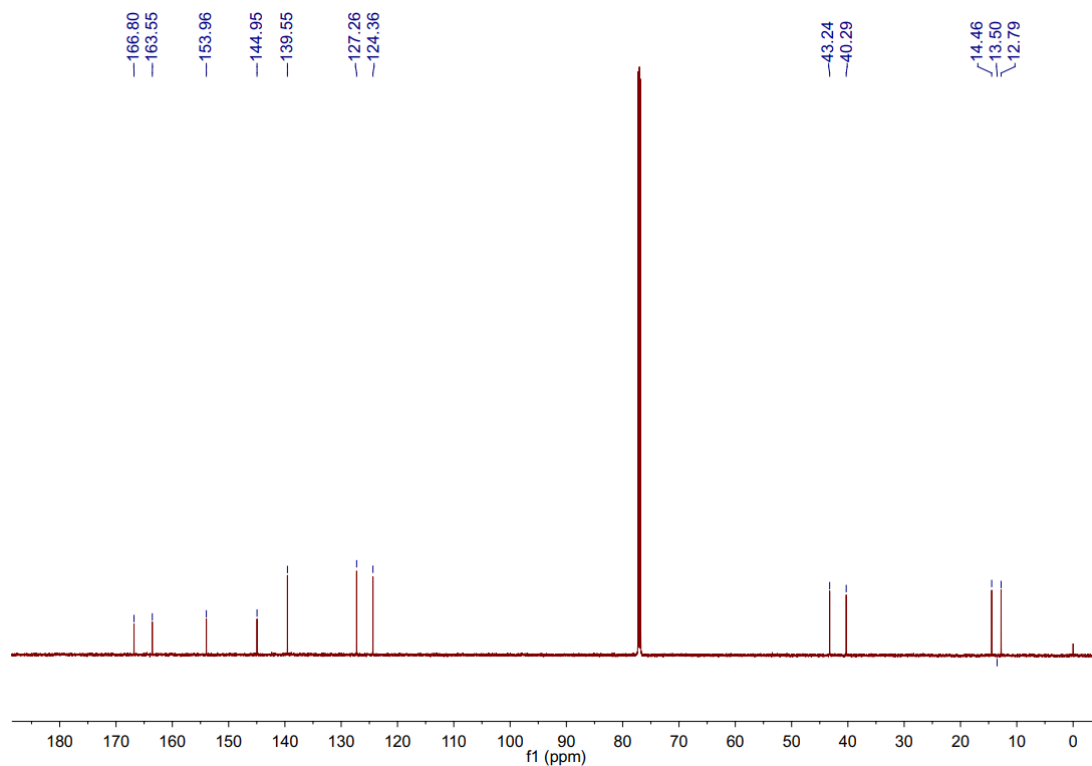

**Figure S5.**  $^{13}\text{C}$  NMR (151 MHz, 298 K,  $\text{CDCl}_3$ ) spectrum of **L-A**.

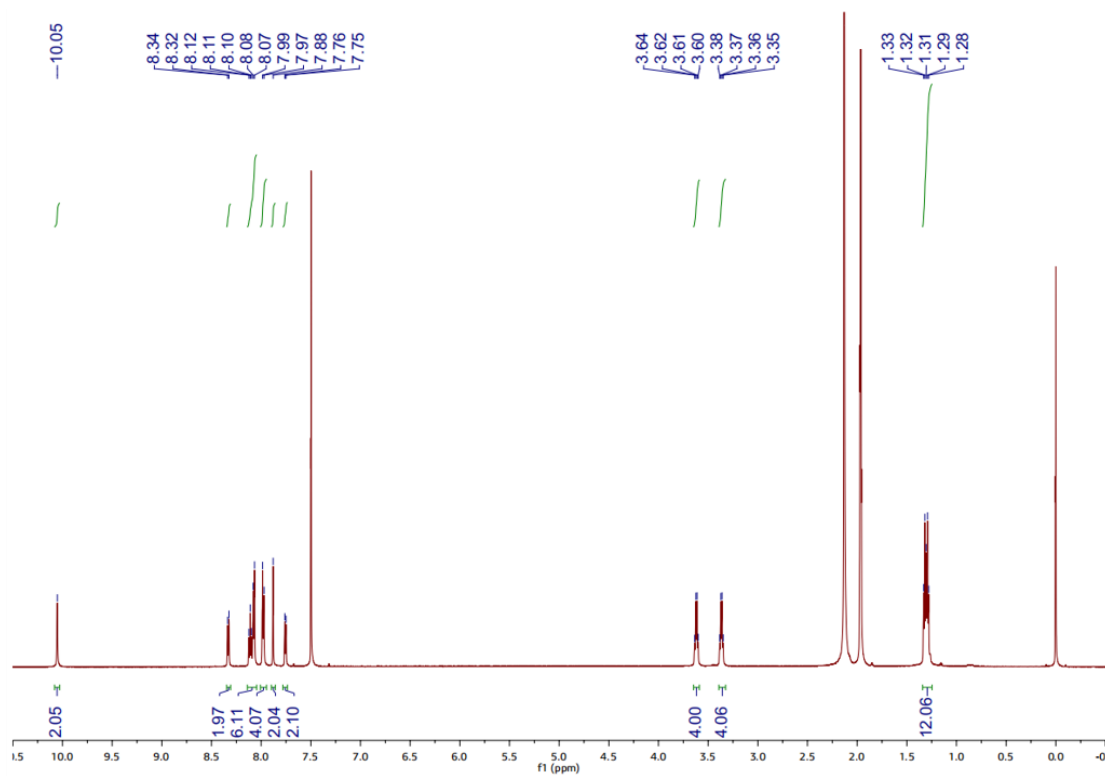

**Figure S6.**  $^1\text{H}$  NMR (600 MHz, 298 K,  $\text{CD}_3\text{CN}/\text{CDCl}_3 = 1/1$ ) spectrum of **L-B**.

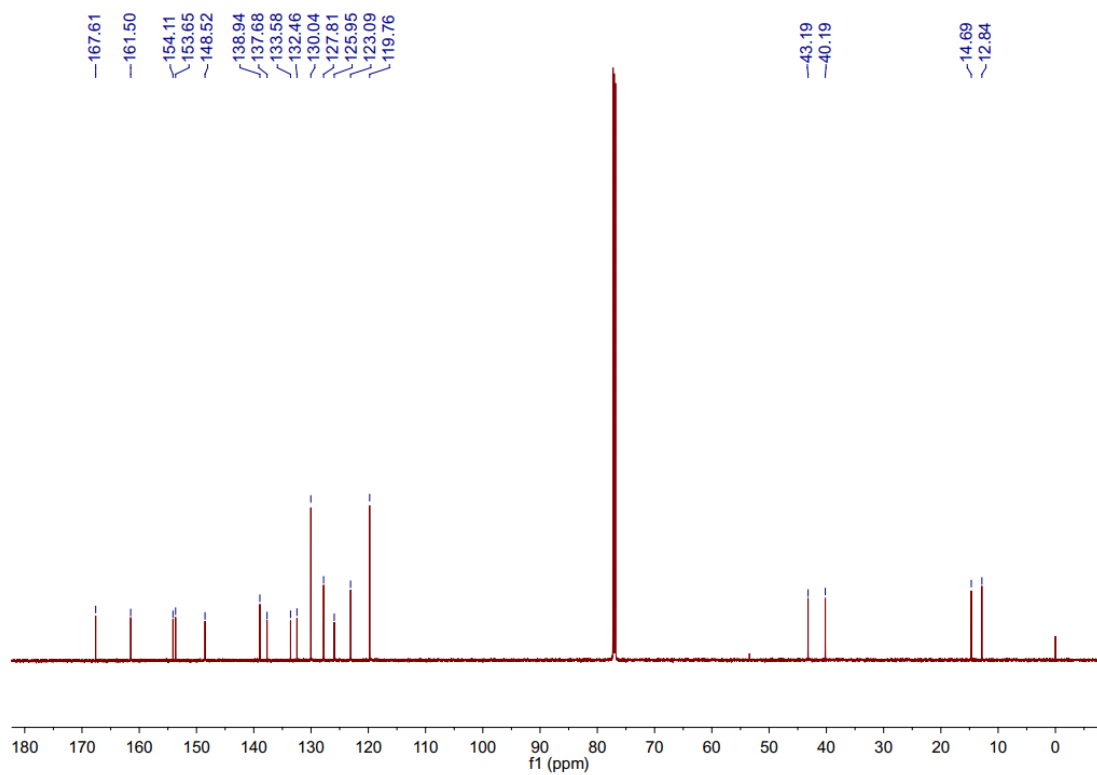

**Figure S7.**  $^{13}\text{C}$  NMR (151 MHz, 298 K,  $\text{CDCl}_3$ ) spectrum of **L-B**.

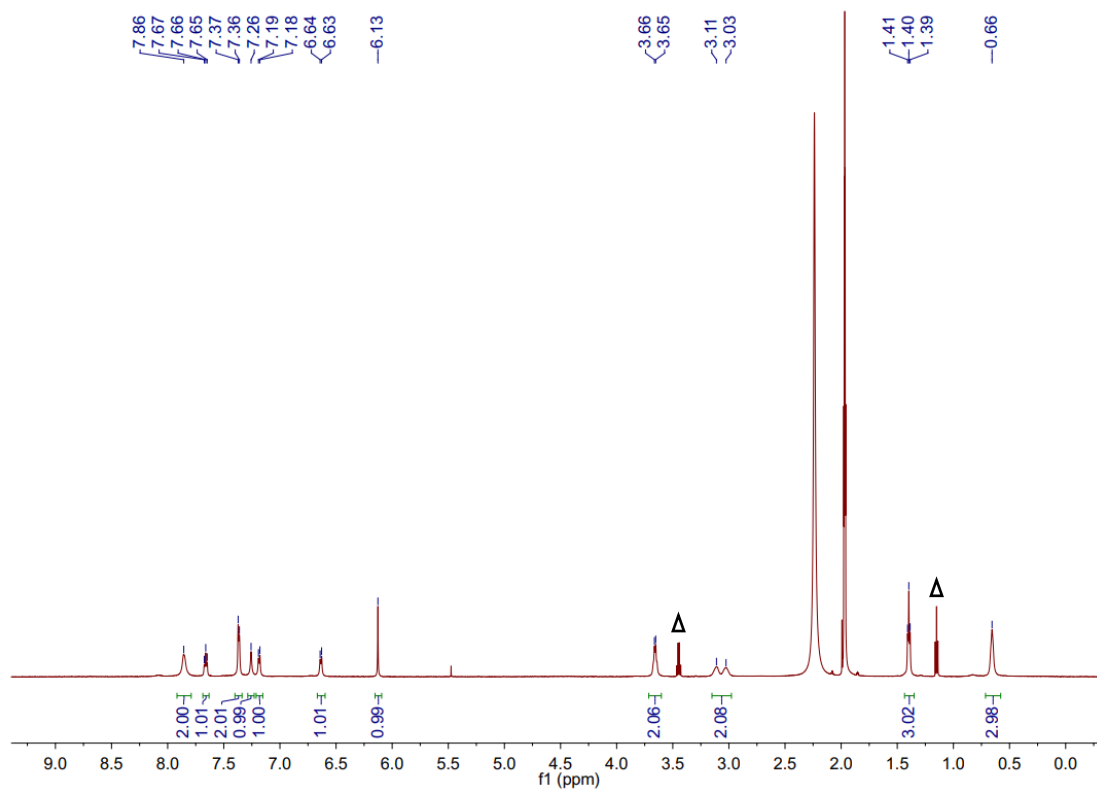

**Figure S8.**  $^1\text{H}$  NMR (600 MHz, 298 K,  $\text{CD}_3\text{CN}$ ) spectrum of **CA**. ( $\Delta = \text{Et}_2\text{O}$  in  $\text{CD}_3\text{CN}$ )

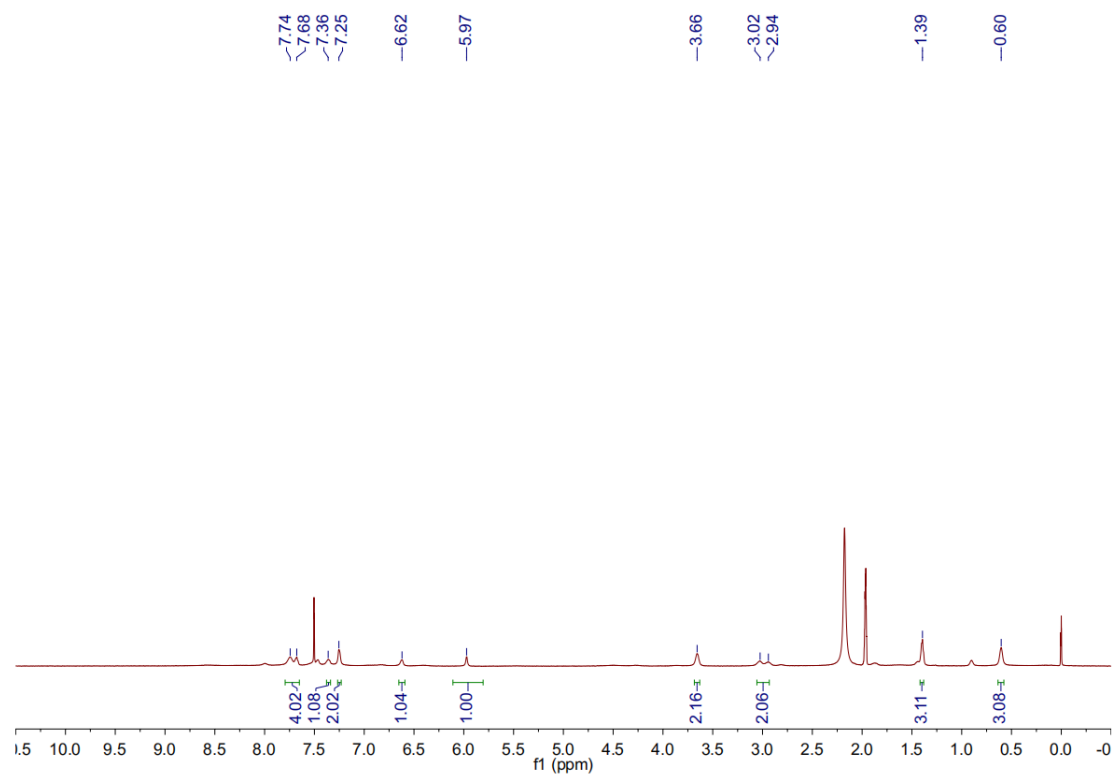

**Figure S9.**  $^1\text{H}$  NMR (600 MHz, 298 K,  $\text{CD}_3\text{CN}/\text{CDCl}_3 = 1/1$ ) spectrum of **CA**.

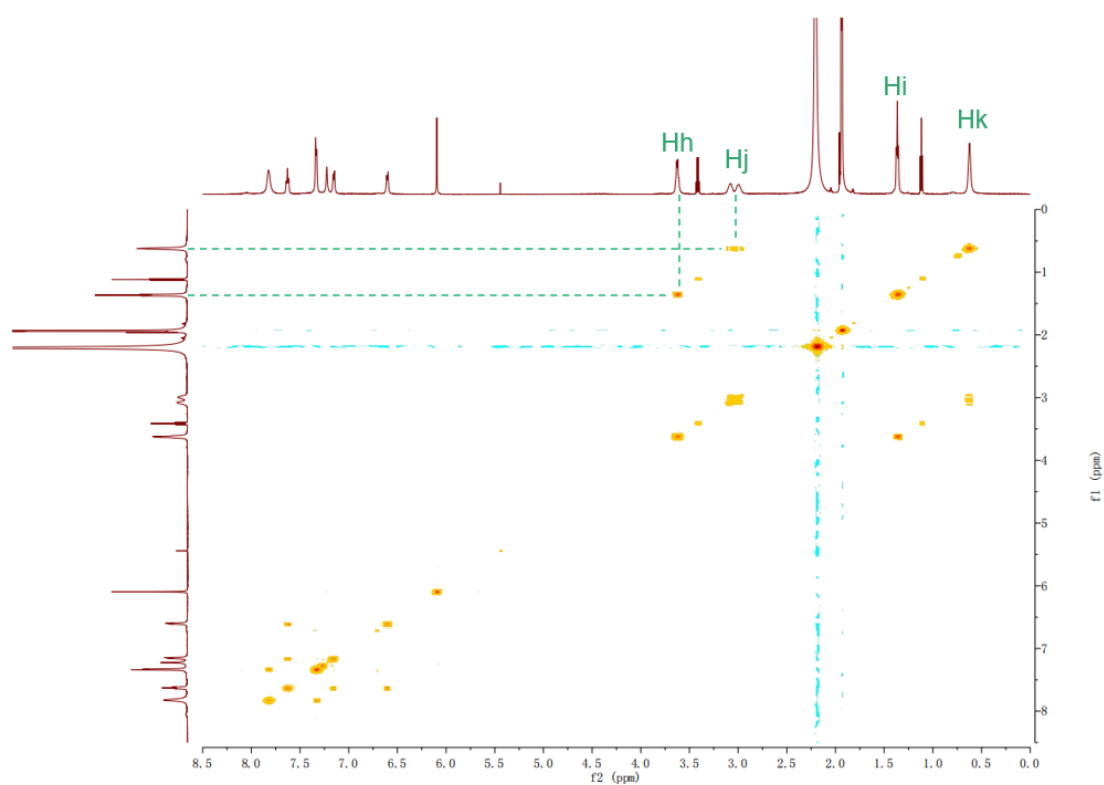

**Figure S10.** Aromatic region of the COSY ( $\text{CD}_3\text{CN}$ ) spectrum of **CA**.

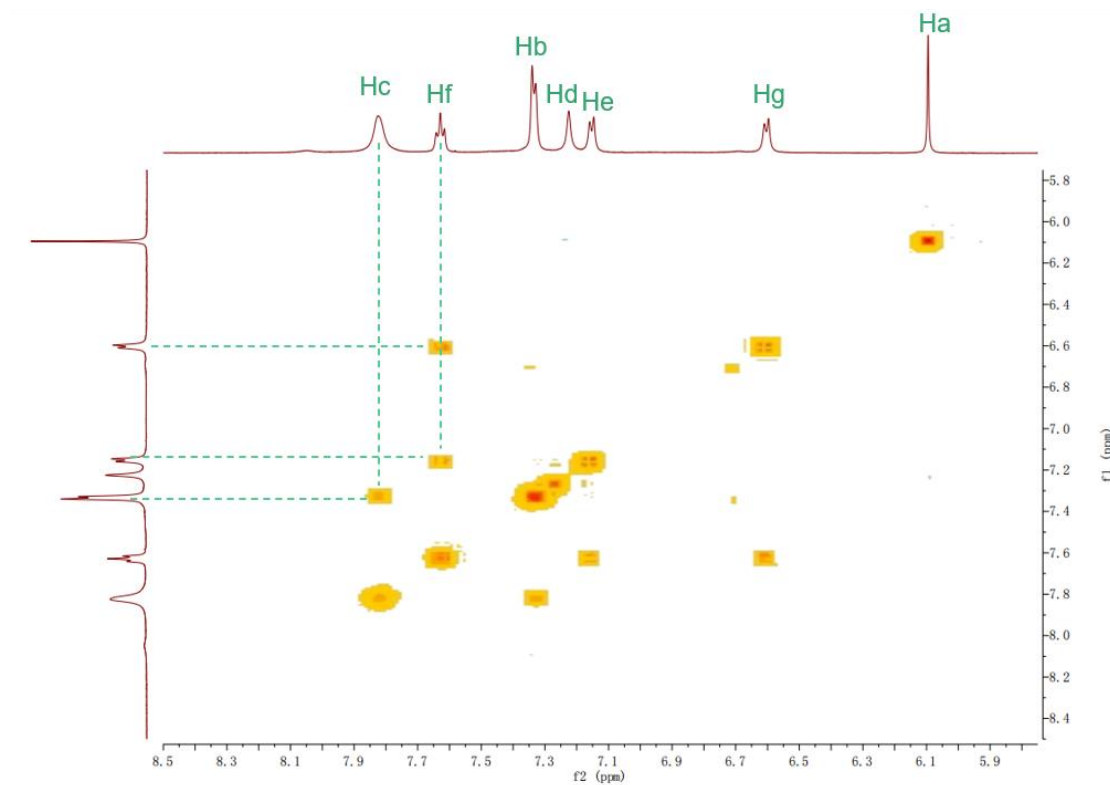

**Figure S11.** Aromatic region magnification of the COSY (CD<sub>3</sub>CN) spectrum of **Ca**.

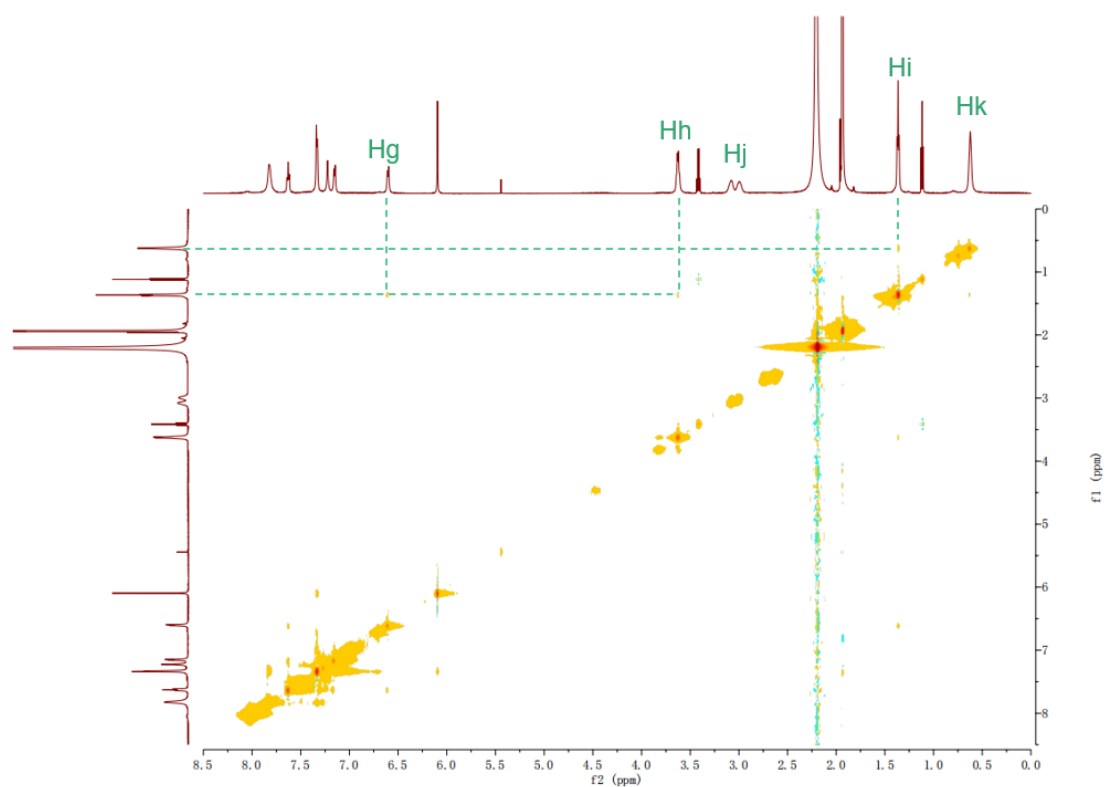

**Figure S12.** Aromatic region of the NOESY ( $\text{CD}_3\text{CN}$ ) spectrum of **CA**.

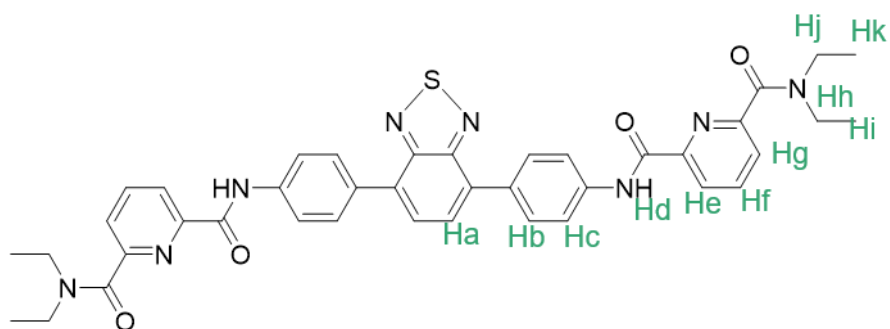

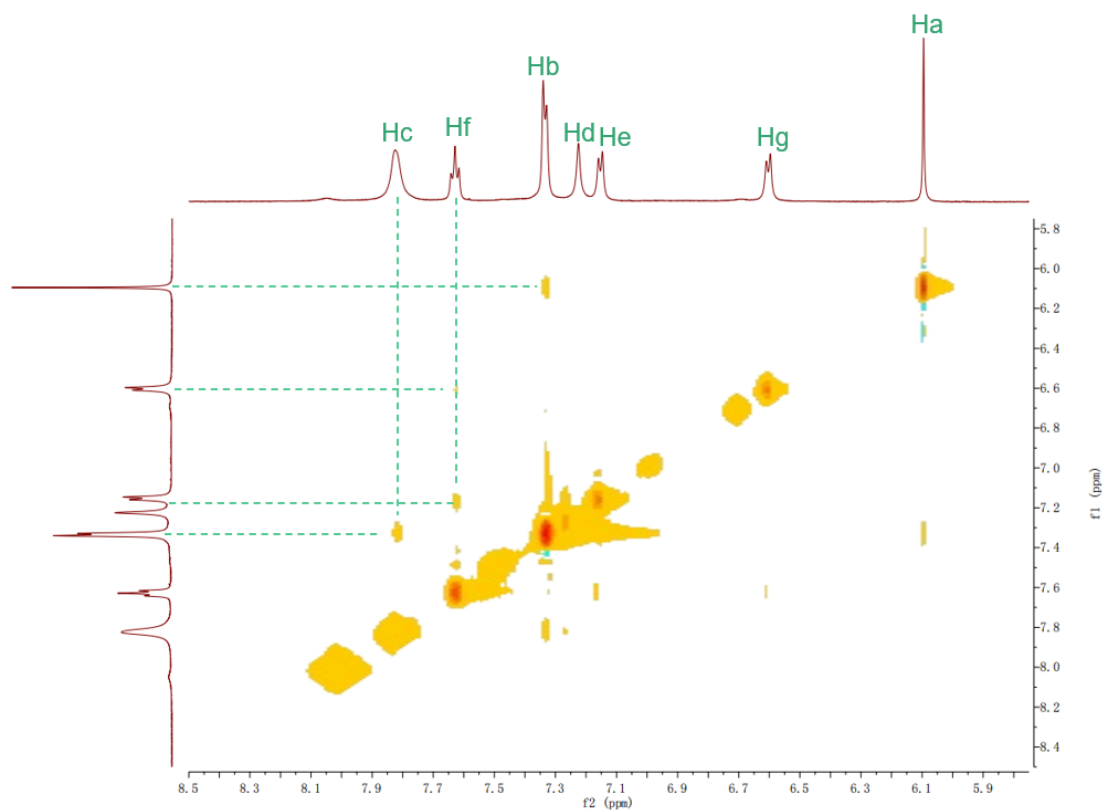

**Figure S13.** Aromatic region magnification of the NOESY ( $\text{CD}_3\text{CN}$ ) spectrum of CA.

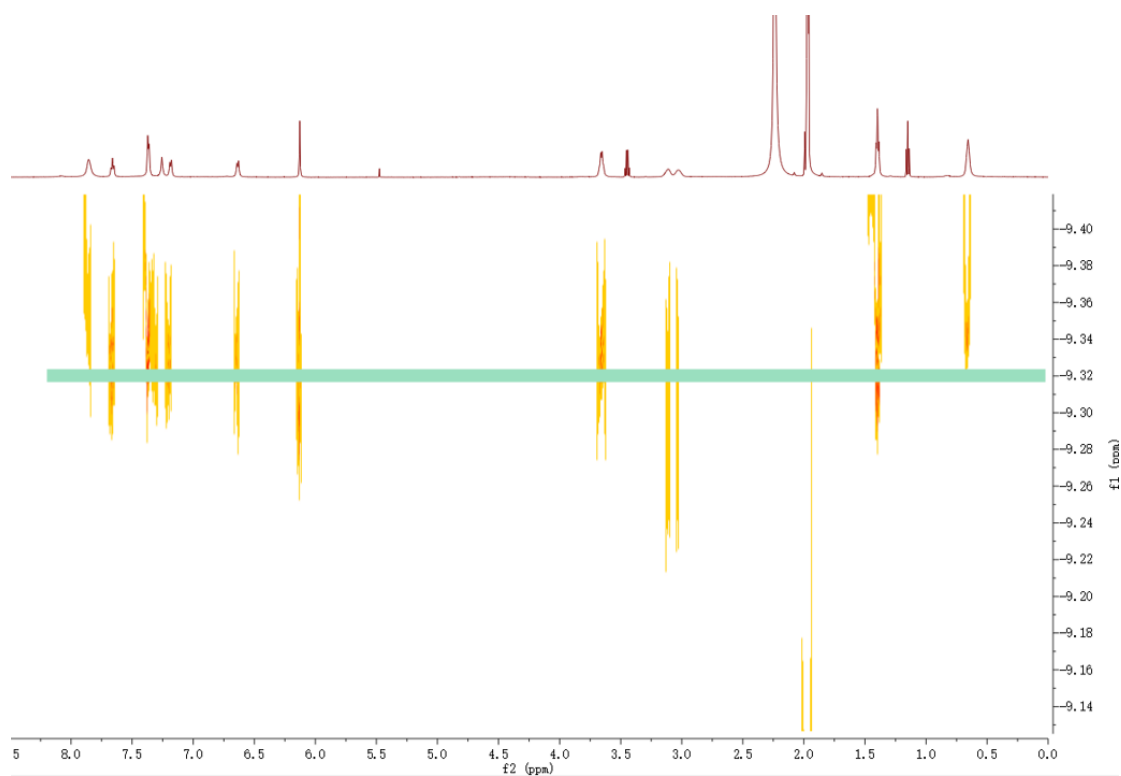

**Figure S14.** Aromatic region of the DOSY ( $\text{CD}_3\text{CN}$ ) spectrum of CA.



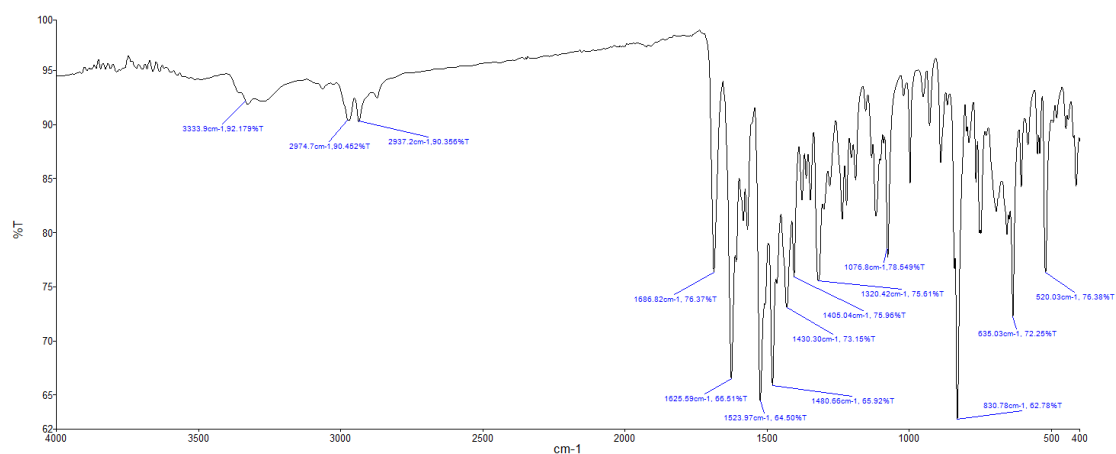

**Figure S15.** IR spectrum of L-B.

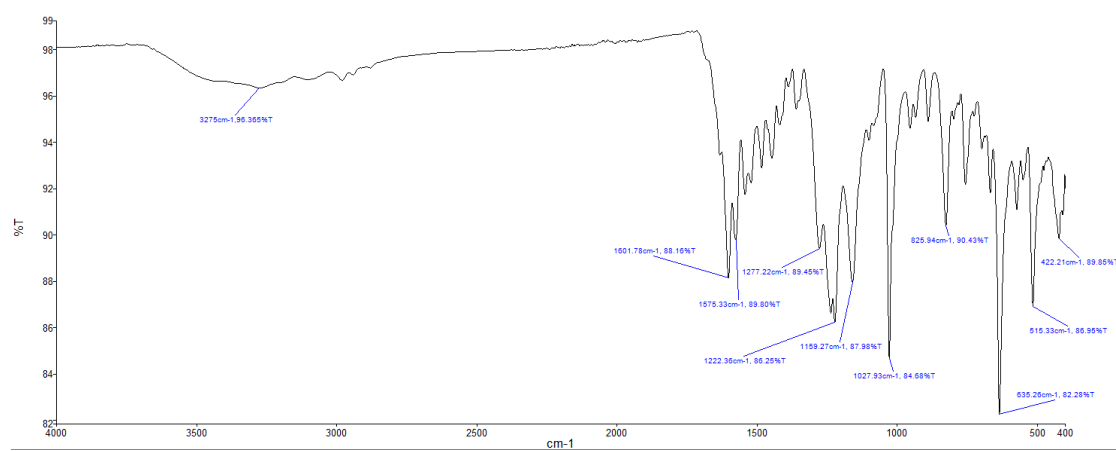

**Figure S16.** IR spectrum of Ca.

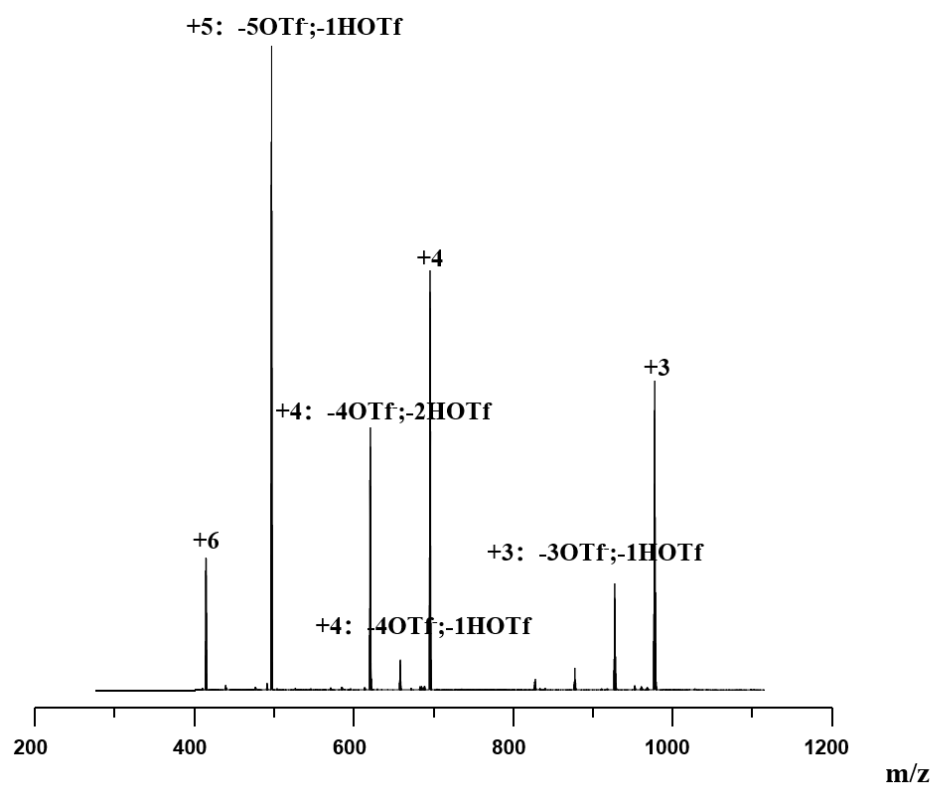

**Figure S17.** ESI-MS spectrum of Ca.

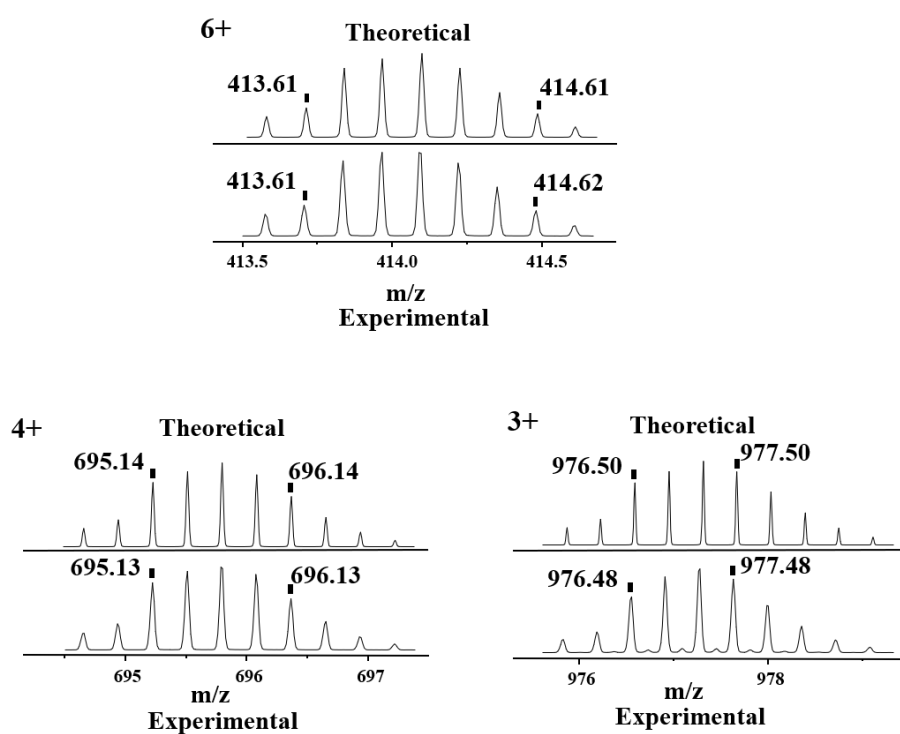

**Figure S18.** Calculated (top) and Measured (bottom) isotope patterns for different charge states observed from Ca (OTf as counterion).

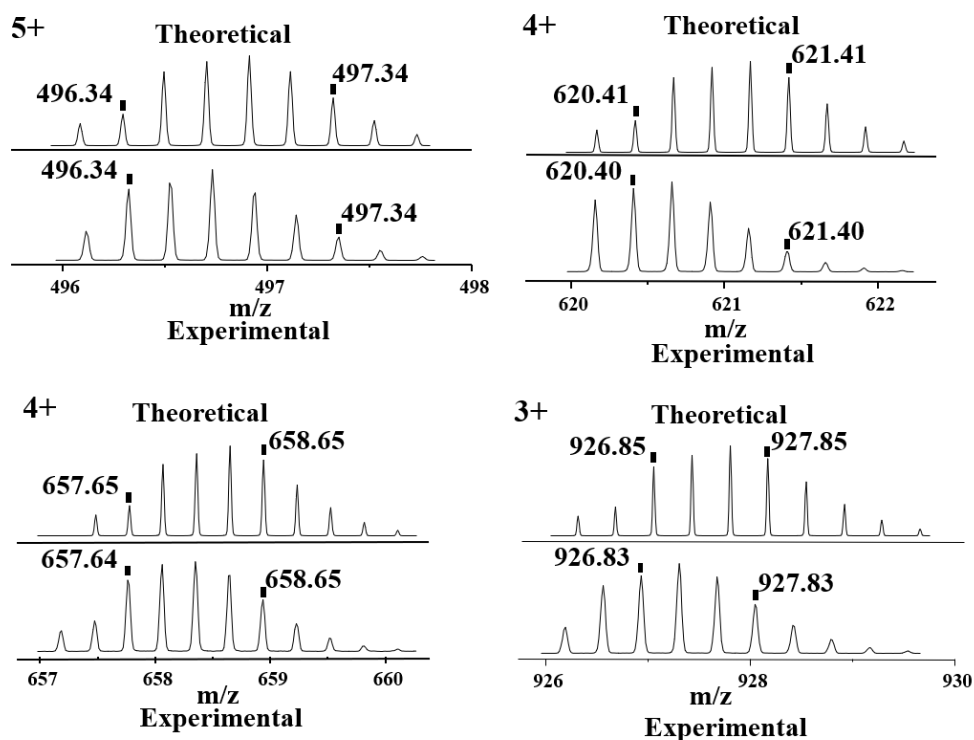

**Figure S19.** Calculated (top) and Measured (bottom) isotope patterns for different charge states observed from  $C_A$  (OTf and HOTf as counterion).

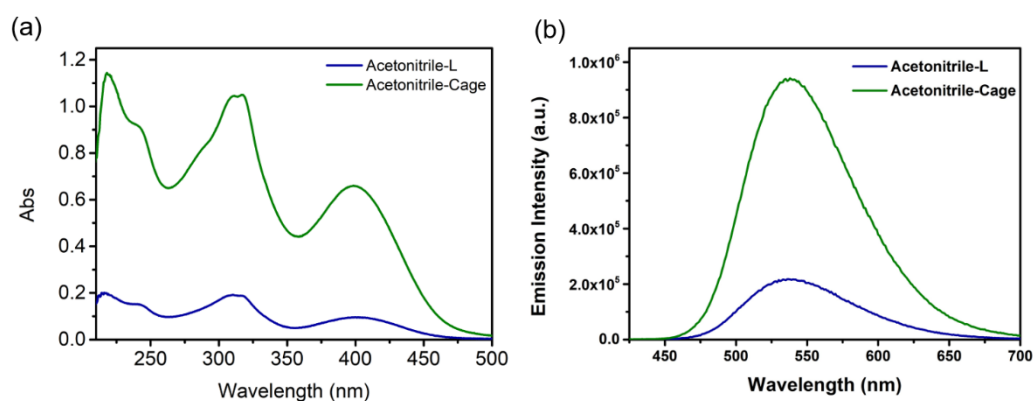

**Figure S20.** Optical properties of  $C_A$  and  $L-B$  in acetonitrile ( $c=50 \text{ ug/mL}$ ). (a) UV-Vis absorption. (b) PL emission spectra ( $\lambda_{\text{ex}} = 400 \text{ nm}$ ).

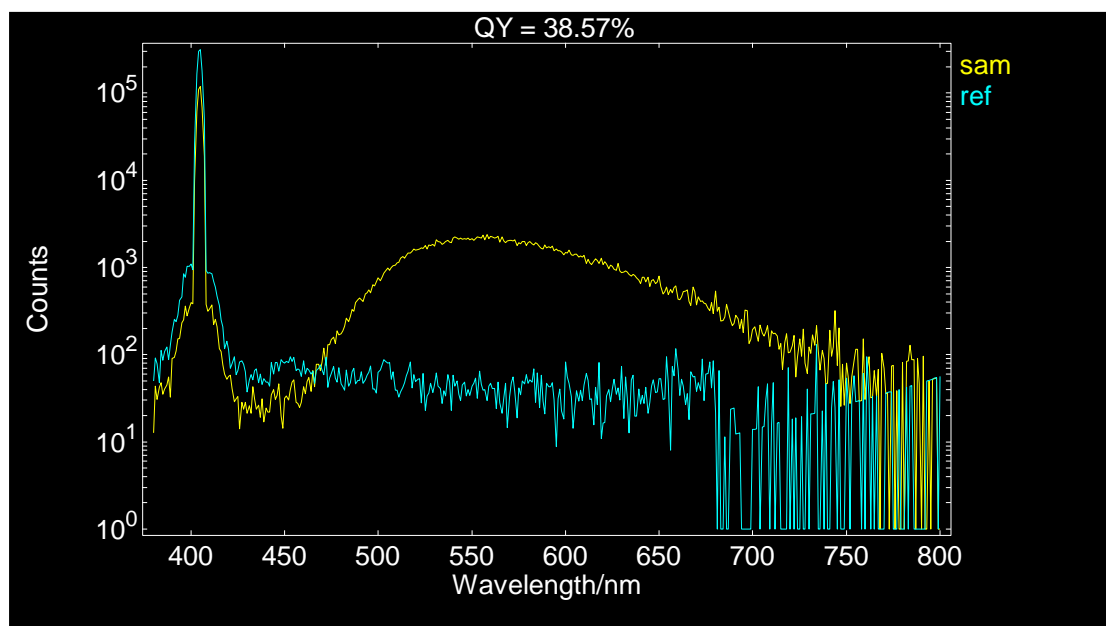

**Figure S21.** the absolute PL quantum yield of  $C_A$  in acetonitrile ( $c=50\text{ }\mu\text{g/mL}$ ).

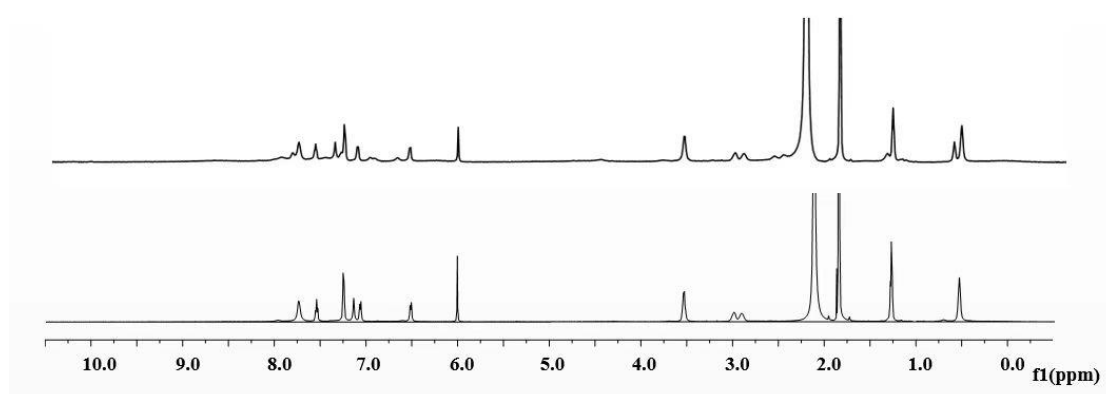

**Figure S22.**  $^1\text{H}$  NMR spectra (600 MHz,  $\text{CD}_3\text{CN}$ , 298 K) of  $C_A$  + DMEM. (up), and  $C_A$ . (down).
